# Supplementary material
Source: Springer Nature journal article supplement (https://www.springermedizin.de/resource/supplementary/12884_2009_256_MOESM4_ESM.pdf/9459952)
Supplement: MOESM4 [file 9459952]

Case ID (one form per stillborn):

Date and place:

Unknown  
Present  
Not present

ICD code

Case characteristics

Number Scale

☐ Antepartum☐ Intrapartum

☐ < 1000 g / 28 w☐ ≥ 1000 g / 28 w

☐ Male☐ Female

Plurality (number of fetuses)

n

If multiples: in order of birth

n

Gestation at birth (completed)

+

 w+day

Gestation estimate by:

☐ Clinical examination

☐ Last menstrual period

☐ US or assisted reprod.

Birth weight g

Placental weight g

Time from death to birth days

Maternal characteristics

Age at delivery years

Pre-pregnancy weight kg

Weight at delivery kg

Height cm

Previous pregnancies n

All births (> 500 g / 22 weeks) n

Spontaneous abortions (< 500 g / 22 weeks) n

Terminations n

Perinatal deaths n

Delivery and care level

☐ Vaginal spontaneous

☐ Operative elective

☐ Vaginal assisted

☐ Operative other

☐ Home delivery

☐ 1<sup>st</sup> line institution

☐ In transit to care

☐ 2<sup>nd</sup> line institution

Attendance:

☐ Unattended

☐ Skilled - no OB available

☐ Traditional

☐ Skilled - OB available

☐

☐ Obstetrician (OB)

Quality of care

Antenatal visits n

Time of first antenatal visit week

Fundal height measures n

Ultrasound scans (US) n

Comments to care:

Antenatal Intrapartum

Adequate Suboptimal Unknown Adequate Suboptimal Unknown

Availability of care

Maternal utilization of care

Professional provision of care

Antepartum conditions

☐ Any antepartum condition.....

☐

☐

☐

If present:

Maternal hypertension

Maternal infection

Maternal malnutrition

Maternal anemia

Other maternal condition

Preterm PROM

Fetal anomaly

Other fetal condition

Intrauterine infection

Placental complication

Cord complication

Intrapartum conditions

☐ Any intrapartum conditions.....

☐

☐

☐

If present:

Disproportion / dystocia

Malpresentation

Prolonged labor

Placental complication

Cord complication

Intrapartum other

Evaluations

☐ All evaluations below.....

☐

☐

☐

If not all:

History review / verbal autopsy

Clinical evaluations (mother)

Tests for infections

Macroscopic evaluation

Autopsy

Placenta macroscopy

Placenta histopathology

Chromosomal / genetic analyses

Cause of death and associated conditions

Cause of death

1<sup>st</sup> associated condition

2<sup>nd</sup> associated condition

Comments to cause:

Registrants ID and signature
